# Supplementary material
Source: PubMed Central journal article supplement (PMC5292054)
Supplement: NIHMS833222-supplement-1.pdf [file NIHMS833222-supplement-1.pdf]

## Supplementary Legends:

**Supplementary Fig. S1:** Percentage of drugs per drug class among drug libraries used in the HTS. Three libraries of FDA-approved drugs were used in this screen (MS Discovery US Drug Collection, NCI Approved Oncology Drug Set II and the NCI Combo Set).

**Supplementary Fig. S2:** Synergistic GFP reactivation in YB5 cells by HDACi TSA and positive hits identified in the HTS. A, Average values of all positive controls, included in each 96 well-plates (in quadruplicates), during HTS, with HDACi TSA (24h, 0.2  $\mu$ M) and decitabine (DAC, 72h, 50 nM) and their sequential combination. Statistical analysis was done by One-way ANOVA followed by the Tukey–Kramer Multiple Comparison Test ( $P < 0.0001$ ). B, Validation experiment with digitoxin (24h treatment) in sequential combination after decitabine (72h treatment) and the doses indicated on the graph. GFP expression was measured immediately after digitoxin treatments by flow cytometry (n=3). C, Validation experiments with positive hits identified in the HTS in combination with decitabine (sequential and simultaneous) or with TSA (sequential).

**Supplementary Fig. S3.** Optimization of the treatment schedule of the decitabine and proscillaridin A combination. Time of exposure was modified to identify which schedule would induce the most potent GFP reactivation. Simultaneous combination of 24, 48, and 72h were compared with sequential combination with decitabine (48h, 100 nM) followed by proscillaridin A (24h and 48h at 50 nM).

**Supplementary Fig. S4.** Transcriptome analysis using Metascape. A, Results of Metascape analysis in genes exclusively up-regulated with proscillaridin A treatment. B, Results of Metascape analysis in genes exclusively up-regulated by the combination treatment.

n=1,118 drugs

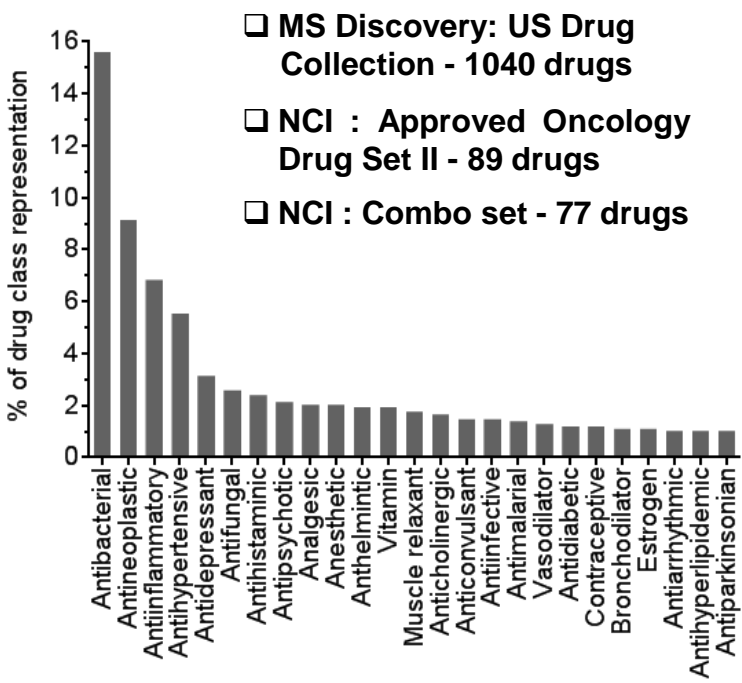

# Supplementary Fig. S2.

**A**

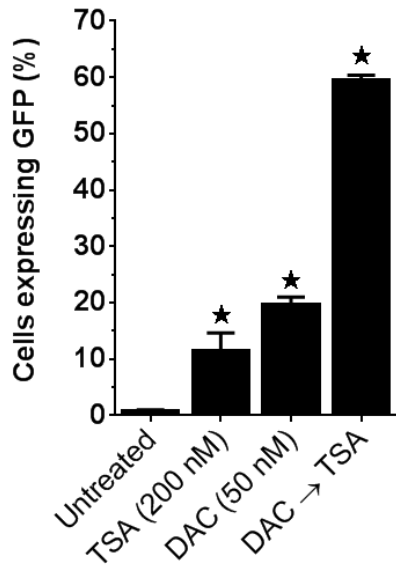

**B**

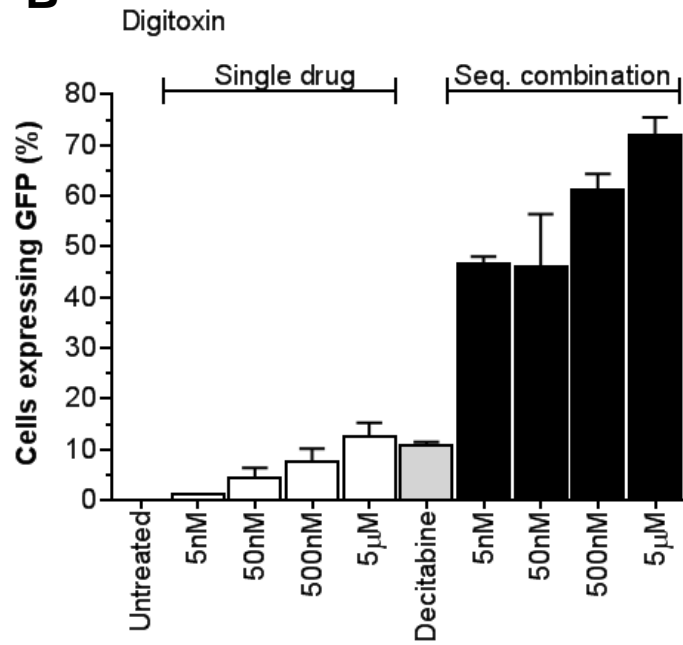

**C**

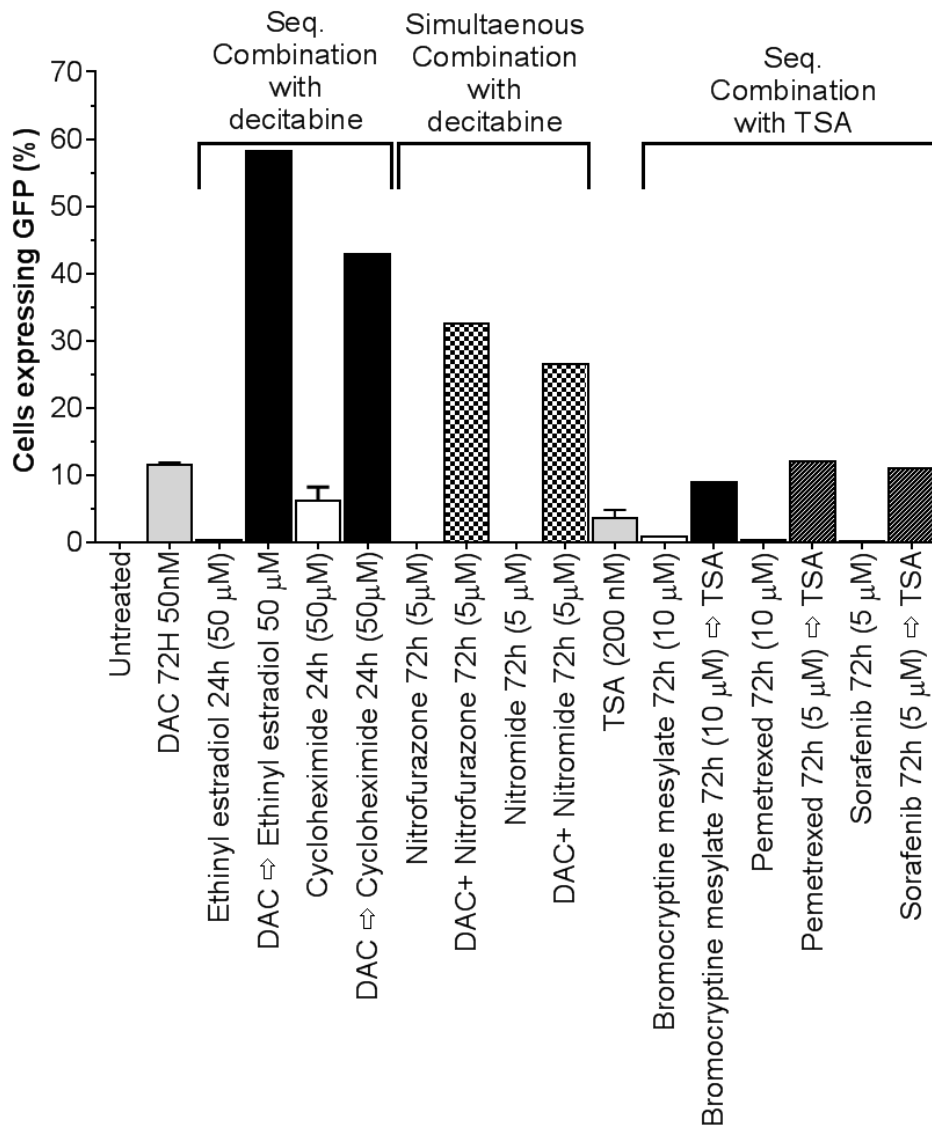

Supplementary Fig. S3.

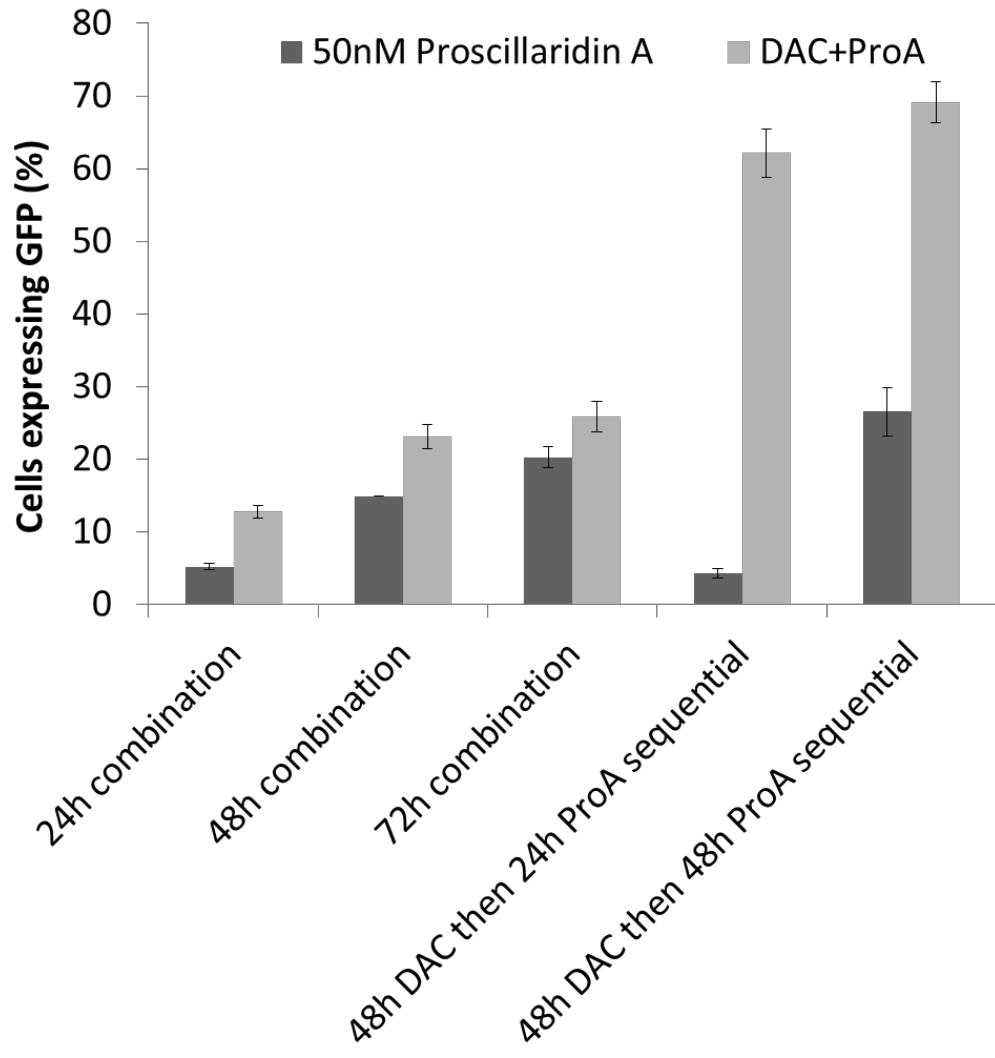

# Supplementary Fig. S4.

## A

### Up-regulated genes in Pros. A

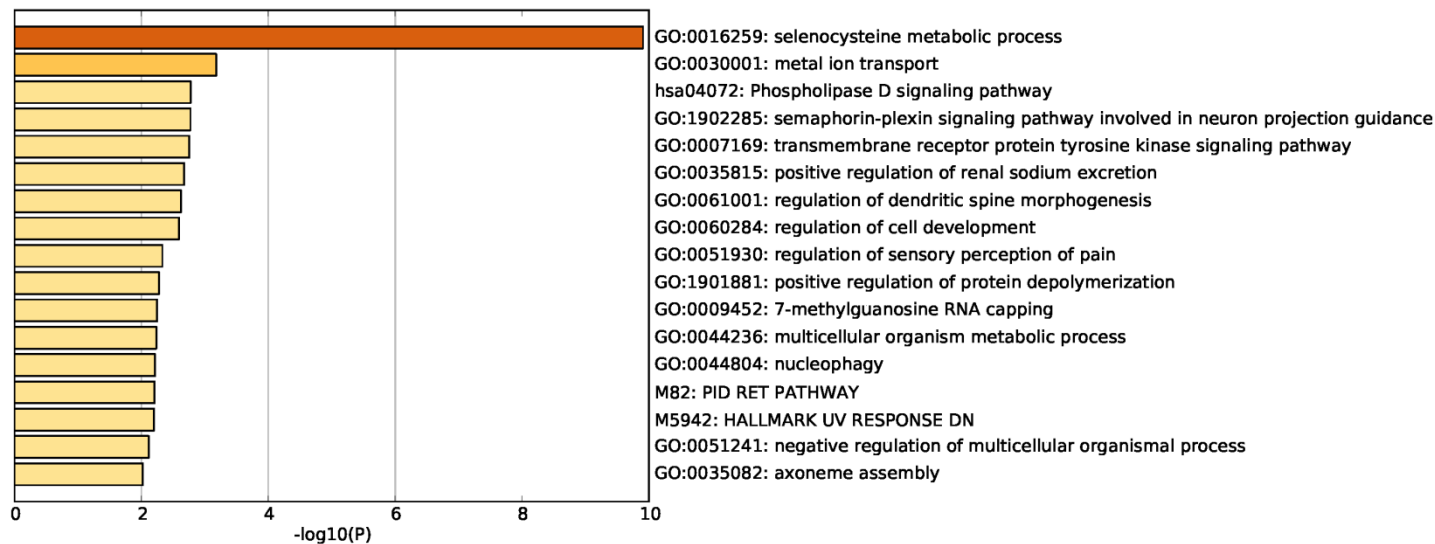

## B

### Up-regulated genes in Combi.

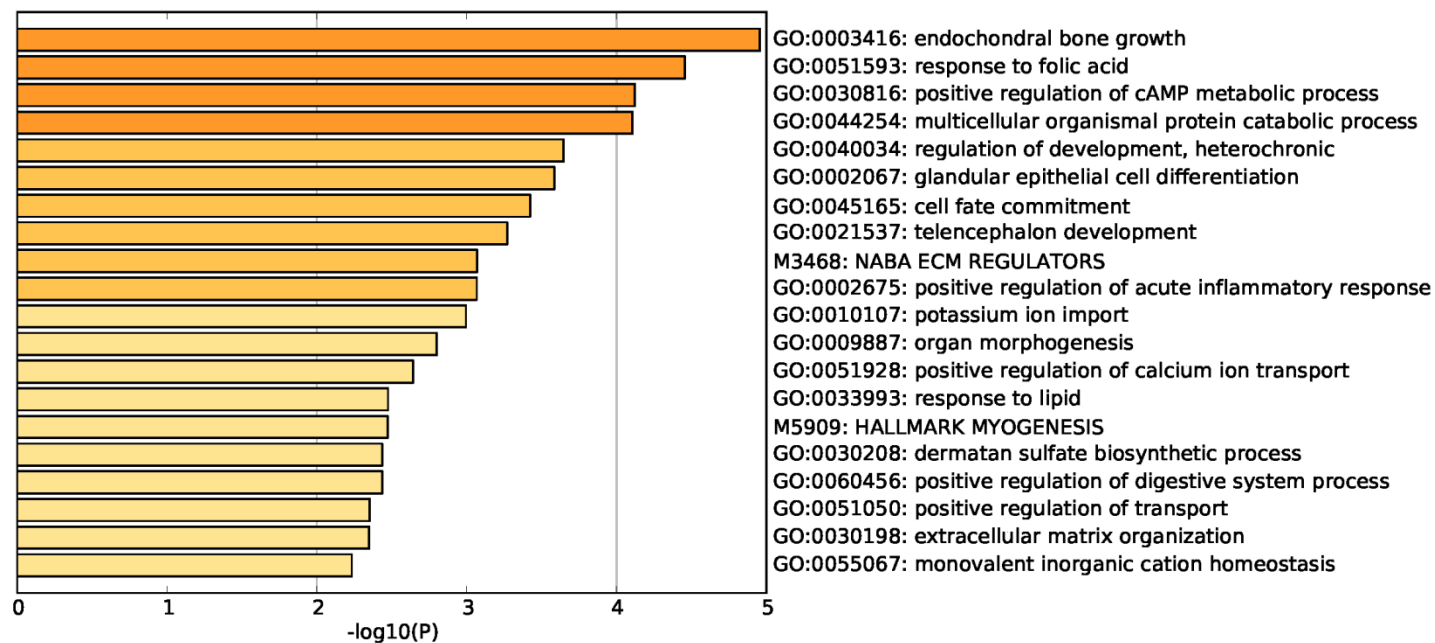

**Supplementary Table S1.** List of GO-Terms identified by Metascape analysis in gene data sets exclusively up-regulated by proscillaridin A treatment and exclusively up-regulated by the combination treatment.

| <b>Treatment</b>                                   | <b>GO-Term numbers</b> | <b>Descriptions</b>                                       |
|----------------------------------------------------|------------------------|-----------------------------------------------------------|
| <u>Proscillaridin A</u><br>(non overlapping genes) | GO:0070509             | Calcium Ion Import                                        |
|                                                    | GO:0006816             | Calcium Ion Transport                                     |
|                                                    | GO:0006874             | Cellular Calcium Ion Homeostasis                          |
|                                                    | GO:0051480             | Regulation of Cytosolic Calcium Ion Concentration         |
| <u>Combination</u><br>(non overlapping genes)      | GO:0090280             | Positive Regulation of Calcium Ion Import                 |
|                                                    | GO:0051928             | Positive Regulation of Calcium Ion Transport              |
|                                                    | GO:0051928             | Positive Regulation of Calcium Ion Transport              |
|                                                    | GO:0010524             | Positive Regulation of Calcium Ion Transport Into Cytosol |

**Supplementary Table S2.** List of GO-Terms identified by Metascape analysis among down-regulated genes shared by proscillaridin A and the combinatorial treatment with decitabine.

| <b>GO-Term numbers</b> | <b>Descriptions</b>                                 |
|------------------------|-----------------------------------------------------|
| GO:0031497             | Chromatin Assembly                                  |
| GO:0006333             | Chromatin Assembly or Disassembly                   |
| GO:0006325             | Chromatin Organization                              |
| GO:0006325             | Chromatin Organization                              |
| GO:0006338             | Chromatin Remodeling                                |
| GO:0031055             | Chromatin Remodeling at Centromere                  |
| GO:0006342             | Chromatin Silencing                                 |
| GO:0000183             | Chromatin Silencing at RDNA                         |
| GO:0032776             | DNA Methylation on Cytosine                         |
| GO:0006304             | DNA Modification                                    |
| GO:0006335             | DNA Replication-dependent Nucleosome Assembly       |
| GO:0034723             | DNA Replication-dependent Nucleosome Organization   |
| GO:0006336             | DNA Replication-independent Nucleosome Assembly     |
| GO:0034724             | DNA Replication-independent Nucleosome Organization |
| GO:0016458             | Gene Silencing                                      |
| GO:0043486             | Histone Exchange                                    |
| GO:0016570             | Histone Modification                                |
| GO:0045814             | Negative Regulation of Gene Expression, Epigenetic  |
| GO:0006334             | Nucleosome Assembly                                 |
| GO:0034728             | Nucleosome Organization                             |
| GO:0045815             | Positive Regulation of Gene Expression, Epigenetic  |
| GO:0040029             | Regulation of Gene Expression, Epigenetic           |

**Supplementary Table S3.** Antagonistic hits identified in combination HTS with sequential decitabine treatment. Drug names, drug function and GFP ratio are shown.

| <u>Combination</u>                           | <u>Drug name</u>              | <u>Drug function</u> | <u>GFP Ratio</u> |
|----------------------------------------------|-------------------------------|----------------------|------------------|
| <b><u>Sequential<br/>with decitabine</u></b> | Fluphenazine hydrochloride    | Antipsychotic        | 0.00             |
|                                              | Penfluridol                   | Antipsychotic        | 0.00             |
|                                              | Toremiphen citrate            | Anticancer           | 0.00             |
|                                              | Hexylresorcinol               | Antiseptic           | 0.00             |
|                                              | Gentian violet                | Antibacterial        | 0.00             |
|                                              | Econazole nitrate             | Antifungal           | 0.01             |
|                                              | Tamoxifen citrate             | Anticancer           | 0.01             |
|                                              | Thioridazine hydrochloride    | Antipsychotic        | 0.01             |
|                                              | Selamectin                    | Anthelmintic         | 0.02             |
|                                              | Sertraline hydrochloride      | Antidepressant       | 0.02             |
|                                              | Perhexiline maleate           | Coronary vasodilator | 0.02             |
|                                              | Gramicidin A                  | Antibacterial        | 0.02             |
|                                              | Mefloquine                    | Antimalarial         | 0.04             |
|                                              | Dioxybenzone                  | Sunscreen            | 0.04             |
|                                              | Estradiol valerate            | Estrogen             | 0.05             |
|                                              | Perphenazine                  | Antipsychotic        | 0.05             |
|                                              | Cetylpyridinium chloride      | Antiinfective        | 0.06             |
|                                              | Fluoxetine                    | Antidepressant       | 0.09             |
|                                              | Norgestimate                  | Contraceptive        | 0.09             |
|                                              | Diphenhydramine hydrochloride | Antihistaminic       | 0.10             |
|                                              | Thiothixene                   | Antipsychotic        | 0.11             |
|                                              | Triclosan                     | Antiinfective        | 0.15             |
|                                              | Astemizole                    | Antihistaminic       | 0.17             |
|                                              | Nitrogen mustard              | Anticancer           | 0.19             |
|                                              | Mepartricin                   | Antifungal           | 0.21             |
|                                              | Nylidrin hydrochloride        | Vasodilator          | 0.22             |
|                                              | Mechlorethamine               | Anticancer           | 0.23             |
|                                              | Pyrithione Zinc               | Antibacterial        | 0.24             |
|                                              | Ethinodiol Diacetate          | Contraceptive        | 0.27             |
|                                              | Phenolphthalein               | Cathartic            | 0.29             |
|                                              | Clotrimazole                  | Antifungal           | 0.30             |
|                                              | Mitoxantrone hydrochloride    | Anticancer           | 0.32             |
|                                              | Estradiol cypionate           | Estrogen             | 0.32             |
|                                              | Acrisorcin                    | Antifungal           | 0.33             |
| Dactinomycin                                 | Anticancer                    | 0.40                 |                  |
| Methicillin sodium                           | Antibacterial                 | 0.44                 |                  |
| Candesartan cilextil                         | Antihypertensive              | 0.45                 |                  |



**Supplementary Table S4.** Antagonistic hits identified in combination HTS with simultaneous decitabine treatment. Drug names, drug function and GFP ratio are shown.

| <b><u>Combination</u></b>                      | <b><u>Drug name</u></b>     | <b><u>Drug function</u></b> | <b><u>GFP Ratio</u></b> |
|------------------------------------------------|-----------------------------|-----------------------------|-------------------------|
| <b><u>Simultaneous<br/>with decitabine</u></b> | Methylbenzethonium chloride | Antiinfective               | 0.00                    |
|                                                | Valrubicin                  | Anticancer                  | 0.00                    |
|                                                | Benzethonium chloride       | Antiseptic                  | 0.00                    |
|                                                | Gentian violet              | Antibacterial               | 0.00                    |
|                                                | Dactinomycin                | Anticancer                  | 0.00                    |
|                                                | Epirubicin hydrochloride    | Anticancer                  | 0.01                    |
|                                                | Mitomycin                   | Anticancer                  | 0.01                    |
|                                                | Nitrogen mustard            | Anticancer                  | 0.01                    |
|                                                | Nilotinib                   | Anticancer                  | 0.02                    |
|                                                | Gemcitabine hydrochloride   | Anticancer                  | 0.03                    |
|                                                | Plicamycin                  | Anticancer                  | 0.03                    |
|                                                | Cytarabine                  | Anticancer                  | 0.03                    |
|                                                | Mitoxantrone hydrochloride  | Anticancer                  | 0.03                    |
|                                                | Rapamycin                   | Anticancer                  | 0.03                    |
|                                                | Cladribine                  | Anticancer                  | 0.03                    |
|                                                | Mechlorethamine             | Anticancer                  | 0.03                    |
|                                                | Topotecan hydrochloride     | Anticancer                  | 0.05                    |
|                                                | Dipyridamole                | Coronary vasodilator        | 0.05                    |
|                                                | Everolimus                  | Anticancer                  | 0.07                    |
|                                                | Pyrrithione zinc            | Antibacterial               | 0.07                    |
|                                                | Clofarabine                 | Anticancer                  | 0.09                    |
|                                                | Dasatinib                   | Anticancer                  | 0.09                    |
|                                                | Amsacrine                   | Anticancer                  | 0.10                    |
|                                                | Teniposide                  | Anticancer                  | 0.12                    |
|                                                | Ciclopirox olamine          | Antifungal                  | 0.12                    |
|                                                | Erlotinib hydrochloride     | Anticancer                  | 0.13                    |
|                                                | Thimerosal                  | Antiinfective               | 0.14                    |
|                                                | Fuchsin N                   | Anthelmintic                | 0.14                    |
|                                                | Tyrothricin                 | Antibacterial               | 0.15                    |
|                                                | Cetylpyridinium chloride    | Antiinfective               | 0.15                    |
|                                                | Triethylenemelamine         | Anticancer                  | 0.16                    |
|                                                | Gefitinib                   | Anticancer                  | 0.16                    |
|                                                | Vinorelbine tartrate        | Anticancer                  | 0.18                    |
|                                                | Cycloheximide               | Antipsoriatic               | 0.18                    |
|                                                | Methylene blue              | Antimethemoglobinemic       | 0.19                    |
|                                                | Hexachlorophene             | Antiinfective               | 0.19                    |
|                                                | Etoposide                   | Anticancer                  | 0.19                    |
|                                                | Benzalkonium chloride       | Antiinfective               | 0.20                    |
|                                                | Fluorouracil                | Anticancer                  | 0.21                    |
|                                                | Ixabepilone                 | Anticancer                  | 0.22                    |
| Bortezomib                                     | Anticancer                  | 0.25                        |                         |
| Paclitaxel                                     | Anticancer                  | 0.28                        |                         |
| Aminacrine                                     | Antiseptic                  | 0.29                        |                         |

**Supplementary Table 4 (continued).**

| <b><u>Combination</u></b>     | <b><u>Drug name</u></b>  | <b><u>Drug function</u></b> | <b><u>GFP Ratio</u></b> |
|-------------------------------|--------------------------|-----------------------------|-------------------------|
| <b><u>Simultaneous</u></b>    | Oxaliplatin              | Anticancer                  | 0.31                    |
| <b><u>With decitabine</u></b> | Bromocriptine mesylate   | Antiparkinsonian            | 0.32                    |
|                               | Sirolimus                | Anticancer                  | 0.32                    |
|                               | Azacitidine              | Anticancer                  | 0.33                    |
|                               | Avermectin B1            | Antiparasitic               | 0.33                    |
|                               | Ouabain                  | Heart failure treatment     | 0.33                    |
|                               | Irinotecan hydrochloride | Anticancer                  | 0.33                    |
|                               | Fenbendazole             | Anthelmintic                | 0.34                    |
|                               | Mebendazole              | Anthelmintic                | 0.34                    |
|                               | Oxyphenbutazone          | Antiinflammatory            | 0.34                    |
|                               | Thiostrepton             | Antibacterial               | 0.36                    |
|                               | Monensin A               | Antibacterial               | 0.37                    |
|                               | Selamectin               | Anthelmintic                | 0.38                    |
|                               | Tacrolimus               | Immunosuppressant           | 0.39                    |
|                               | Clioquinol               | Antiseptic                  | 0.40                    |
|                               | Mycophenolic acid        | Immunosuppressant           | 0.40                    |
|                               | Acrisorcin               | Antifungal                  | 0.40                    |
|                               | Nonoxynol-9              | Contraceptive               | 0.43                    |
|                               | Floxuridine              | Anticancer                  | 0.45                    |
|                               | Podofilox                | Anticancer                  | 0.48                    |
|                               | Doxazosin mesylate       | Antihypertensive            | 0.50                    |
|                               | Bleomycin B2             | Anticancer                  | 0.52                    |
|                               | Hycanthone               | Anthelmintic                | 0.57                    |
|                               | Uracil mustard           | Anticancer                  | 0.58                    |
|                               | Docetaxel                | Anticancer                  | 0.59                    |
|                               | Vinblastine sulfate      | Anticancer                  | 0.59                    |

**Supplementary Table S5.** Antagonistic hits identified in combination HTS with sequential TSA treatment. Drug names, drug function and GFP ratio are shown.

| <b><u>Combination</u></b>             | <b><u>Drug name</u></b>     | <b><u>Drug function</u></b> | <b><u>GFP Ratio</u></b> |
|---------------------------------------|-----------------------------|-----------------------------|-------------------------|
| <b><u>Sequential<br/>with TSA</u></b> | Valrubicin                  | Anticancer                  | 0.00                    |
|                                       | Epirubicin hydrochloride    | Anticancer                  | 0.00                    |
|                                       | Dactinomycin                | Anticancer                  | 0.00                    |
|                                       | Plicamycin                  | Anticancer                  | 0.02                    |
|                                       | Mitoxantrone                | Anticancer                  | 0.02                    |
|                                       | Teniposide                  | Anticancer                  | 0.09                    |
|                                       | Penicillin V potassium      | Antibacterial               | 0.11                    |
|                                       | Cycloheximide               | Antipsoriatic               | 0.15                    |
|                                       | Oxymetazoline hydrochloride | Nasal decongestant          | 0.17                    |
|                                       | Bortezomib                  | Anticancer                  | 0.17                    |
|                                       | Fuchsin N                   | Anthelmintic                | 0.18                    |
|                                       | Mechlorethamine             | Anticancer                  | 0.19                    |
|                                       | Nitrogen mustard            | Anticancer                  | 0.19                    |
|                                       | Mepenzolate bromide         | Anticholinergic             | 0.20                    |
|                                       | Benzethonium chloride       | Antiseptic                  | 0.23                    |
|                                       | Ivermectin                  | Antiparasitic               | 0.23                    |
|                                       | Methscopolamine bromide     | Anticholinergic             | 0.24                    |
|                                       | Mebendazole                 | Anthelmintic                | 0.24                    |
|                                       | Novobiocin sodium           | Antibacterial               | 0.25                    |
|                                       | Fenbendazole                | Anthelmintic                | 0.25                    |
|                                       | Tyrothricin                 | Antibacterial               | 0.25                    |
|                                       | Nylidrin hydrochloride      | Vasodilator                 | 0.26                    |
|                                       | Nifedipine                  | Antihypertensive            | 0.27                    |
|                                       | Mafenide hydrochloride      | Antibacterial               | 0.27                    |
|                                       | Lincomycin hydrochloride    | Antibacterial               | 0.31                    |
|                                       | Minocycline hydrochloride   | Antibacterial               | 0.32                    |
|                                       | Minoxidil                   | Antihypertensive            | 0.32                    |
|                                       | Menadione                   | Prothrombogenic agent       | 0.33                    |
|                                       | Gramicidin A                | Antibacterial               | 0.36                    |
|                                       | Noscapine hydrochloride     | Antitussive                 | 0.36                    |
